# Supplementary material
Source: publisher figshare collection journal article supplement (https://acs.figshare.com/ndownloader/files/22202925)
Supplement: Supplementary file 1 [file 22202925]

## SUPPLEMENTARY INFORMATION

### MATERIALS AND METHODS

#### 1. Green fluorescent protein cloning and protein expression

Plasmids and expression strains for bacterial expression were from Novagen. Restriction endonucleases and other molecular biology enzymes were from New England Biolabs. Ion-exchange and gel-filtration carriers were from Amersham Pharmacia Biotech. Percoll was from Sigma. Other chemicals and salts used in experiments were from Serva. cDNA clone for GFP-Cys mutant was obtained from Clontech (clone ID: pEGFP-N2).

5'-primer 5'-GGGAATTCCATATGGGA(TGT)GGAGCAGGAGCAATGGTGAGCAAGGGCG AG-3' (italic, inserted base) and 3' primer 5'-TAGGATCCTTACTTGTACAGCTCGTC-3' were used to produce a GFP-Cys mutant with a cysteine residue inserted at the N-terminus. The cDNA region encoding GFP-mut1 variant (Cormack et al. 1996) in pEGFP-N2 vector (Clontech, Palo Alto, CA) was amplified by PCR. Amplified DNA products were digested with NdeI and BamHI and ligated into pET3A expression plasmid. The presence of the inserted GFP-Cys in the construct was verified by DNA sequencing. *E.coli* strain BL21(DE3)pLysS was used for expression. Cells transformed with recombinant plasmids were grown at 37°C in Luria-Bertani (LB) medium, containing 100 µg/ml ampicillin and 50 µg/ml chloramphenicol to OD<sub>600</sub> 0.6. Expression was induced by addition of isopropyl β-D-thiogalactoside (IPTG) to a final concentration of 0.4 mM. After 4 hrs of induction the cells were harvested by centrifugation and resuspended in the ice-cold lysis buffer (50mM Tris-HCl, 0.1M NaCl, 1mM EDTA, pH 8). Cell disruption was achieved by freezing and thawing of the cell suspension and by sonification. Nucleic acids were precipitated by the addition of 5% solution of polyethyleneimine to a final concentration of 0.1 % and removed together with the insoluble fractions of bacterial cells by centrifugation. Clear cytosolic fraction was concentrated and loaded onto a Superdex G-75 gel filtration column equilibrated in 10 mM phosphate buffer, 200 mM NaCl, pH=8,3. Eluted fractions were analyzed by sodium dodecyl sulfate-polyacrylamide gel electrophoresis (SDS-PAGE). Fractions containing recombinant protein were collected, dialyzed against 10 mM phosphate buffer, pH=7,5 and applied onto a Q-Sepharose column equilibrated with the same buffer. The elution was carried out with a linear gradient of NaCl (0-0.5M) in the starting buffer. Fractions containing the protein as judged by SDS-PAGE analysis and measuring fluorescence ( $\lambda_{\text{ex}}$  488 nm,  $\lambda_{\text{em}}$  507 nm) were concentrated and applied to a Superdex G-75 gel filtration column equilibrated in 10 mM phosphate buffer, 200 mM NaCl, pH=8,3. Only the peak corresponding to the monomeric GFP-Cys was pooled down, concentrated and stored in 10 mM phosphate buffer, pH=7,5.

#### GFP-nanowire conjugates

Nanowire-protein conjugates were produced by mixing 0.4 µg/ml of GFP-Cys mutant (reduced with 10mM dithiothreitol DTT or intact) and 0.1 mg/ml of Mo<sub>6</sub>S<sub>3</sub>I<sub>6</sub> nanowires. The conjugates were left to react over night at 4°C. They were further purified by Percoll gradient centrifugation. A step gradient was prepared with 1,15 ml undiluted Percoll, 1,15 ml diluted 1:2 and 1,7 ml Percoll diluted 1:10. Centrifugation was performed for 2 hrs at 20.000 g using TST 60-4 rotor in a Centrikon T-2070 ultracentrifuge (Kontron Instruments). The GFP-Cys-nanowire conjugates were collected at the interface between 10% and 50% Percoll. The conjugates were subjected to a 1,5 hrs centrifugation at 100.000g using the same rotor as described previously to remove Percoll from the sample. Protein-nanowire conjugates were inspected by AFM.

#### 2. Thyroglobulin

## Isolation and purification

Tg was isolated from porcine thyroids following the protocol described in Brix et al. 1996. Protein purity was checked by SDS-PAGE and by indirect enzyme-linked immunosorbent assay (ELISA) with rabbit anti-pig primary antibodies (Berndorfer U.) diluted goat anti-rabbit HRP-conjugated secondary antibodies (Dianova, Hamburg, Germany). Detection was performed using 0.05% 3,3'-diaminobenzidine tetrahydrochloride (DAB, Sigma, USA) and 0.09% H<sub>2</sub>O<sub>2</sub> in 0.05 M Tris-HCl buffer, pH 7.5.

## Tg Protein-nanowire conjugates

Nanowire-protein conjugates were produced by mixing 0.8 µg/ml of thyroglobulin (reduced with 10mM dithiothreitol DTT or intact) and 0.1 mg/ml of MoS<sub>3</sub>I<sub>6</sub> nanowires. The conjugates were left to react over night at 4°C. They were inspected by AFM.

## Determination of free sulfhydryl groups

In order to determine the presence of free thiol group, Ellman's reagent (5,5'-dithio-bis(2-nitrobenzoic acid, Sigma, USA) which stoichiometrically yields the 5-mercapto-2-nitrobenzoic acid chromophore was used. Two proteins, thyroglobulin containing free thiol groups and stefin B without any thiol group were used as positive control and as a negative control, respectively. 0.1 mg/ml of protein was preincubated with 1mM dithiothreitol (DTT, Fermentas, Germany) for 15 min at room temperature to reduce sulfhydryl groups and then dialyzed against 100mM phosphate buffer, 1.5mM EDTA, pH=8.0 to remove excess DTT. 500 µl of reduced protein (c=0.1mg/ml) and of freshly dispersed nanowires (c=0.1 mg/ml; t<sub>1</sub>=30 min, t<sub>2</sub>= 120 min) in deionized water were mixed with 16.7 µl of Ellman's reagent and absorbance at 412nm was measured. 500 µl of 100mM phosphate buffer, 1.5mM EDTA, pH=8.0 with 16.7 µl of Ellman's reagent were used as blank.

| Sample                           | A (412nm) | A (412nm) with Ellman's reagent |
|----------------------------------|-----------|---------------------------------|
| Negative control (stefin)        | 0         | 0                               |
| Positive control (thyroglobulin) | 0.003     | 0.204                           |
| Nanowires (120 min dispersion)   | 0.037     | 0.103                           |

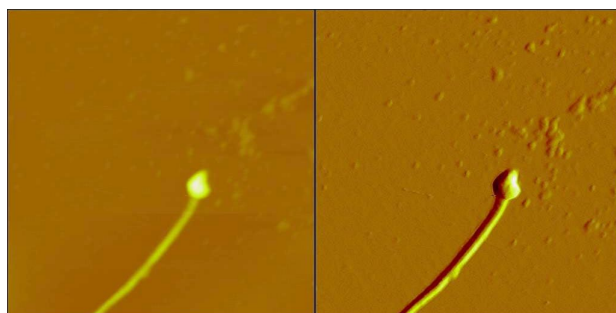

Figure 1: Raw images of height (left) and amplitude (right) of MOSix nanowire bundle with thyroglobulin attached (on mica substrate)

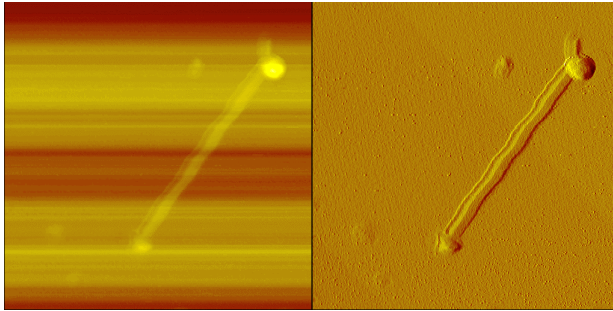

Figure 2: Raw images of height (left) and amplitude (right) of MOSix nanowire bundle with a green fluorescent protein attached at both ends (on mica)

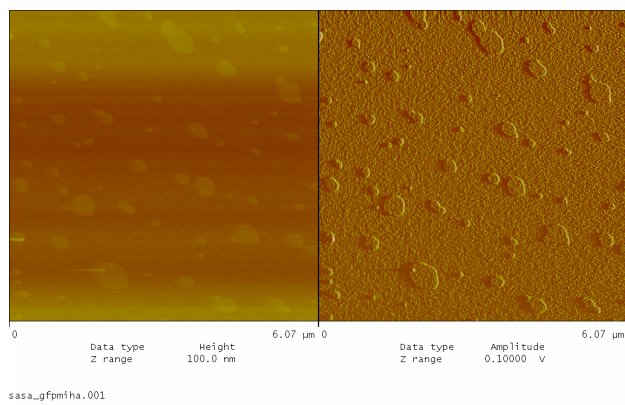

Figure 3: Raw images of height (left) and amplitude (right) of Green fluorescent protein (on mica)

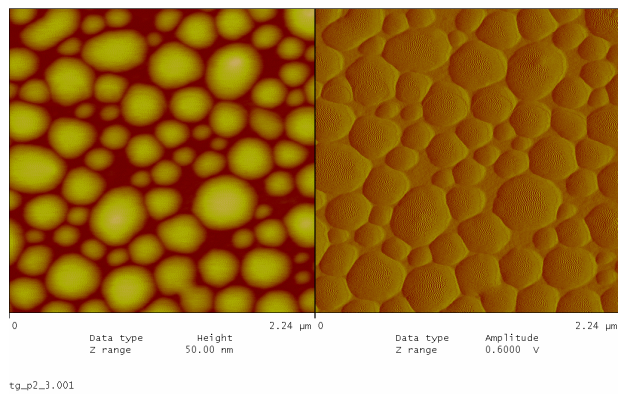

Figure 4: Raw images of height (left) and amplitude (right) of Thyroglobulin (on mica)

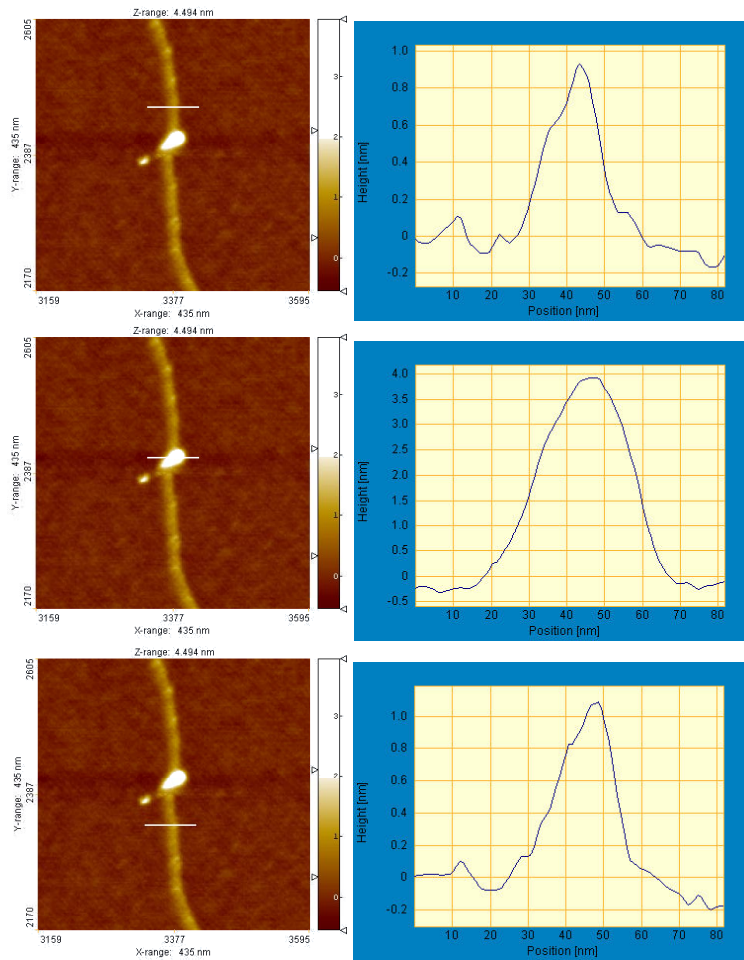

Figure 5. Two MoSiX nanowire bundles attached to a single GNP. The profiles are shown on the right.

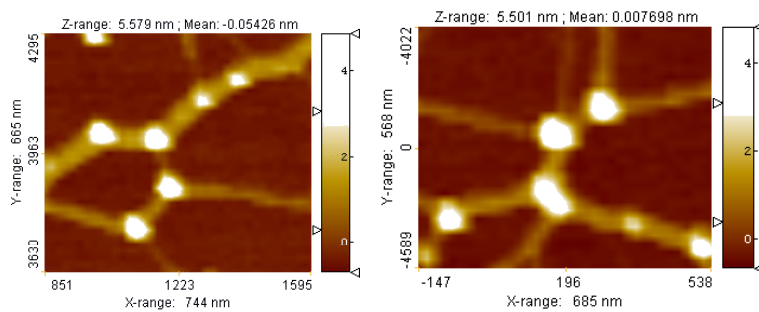

Figure 6 Examples of multi-terminal circuits with multiple MWs and GNPs.

## References

- Brix, K., Lemansky, P. & Herzog, V. (1996). Evidence for Extracellularly Acting Cathepsins Mediating Thyroid Hormone Liberation in Thyroid Epithelial Cells., *Endocrinology* **137**, 1963-1974.
- Cormack, B.P., Valdivia R.H. & Falkow, S. (1996). FACS-optimized mutants of the green fluorescent protein (GFP)., *Gene* **173**, 33-38.
